# Supplementary material
Source: Springer Nature journal article supplement (https://www.springermedizin.de/resource/supplementary/12874_2008_367_MOESM1_ESM.pdf/9434328)
Supplement: MOESM1 [file 9434328]

Enquiries at the study centre (n=1619)

**Excluded (n=809)**

Not screened; requests for information or comments on the study

First screening (n=810)

**Excluded (n=377)**

Did not meet inclusion criteria (n=362)  
No reason given (n=13)  
Declined participation (n=2)

Information booklet sent to eligible callers.

Second screening (n=433)

**Excluded (n=108)**

Decided not to participate (n=99)  
Visited but not enrolled (n=7)  
Duplicate household (n=1)  
Withdrew prior to enrolment (n=1)

Enrolled (n=325)

**Withdrew before start of data collection (n=25)**

Randomised (n=300)
